# Supplementary material for: Influence of the season on vitamin D levels and regulatory T cells in patients with polymorphic light eruption
Source: PubMed Central journal article supplement (PMC4841162; doi:10.1039/c5pp00398a), 2016-02-25
Supplement: PP-015-C5PP00398A-s001.pdf [file PP-015-C5PP00398A-s001.pdf]

Electronic Supplementary Material (ESI) for Photochemical & Photobiological Sciences.

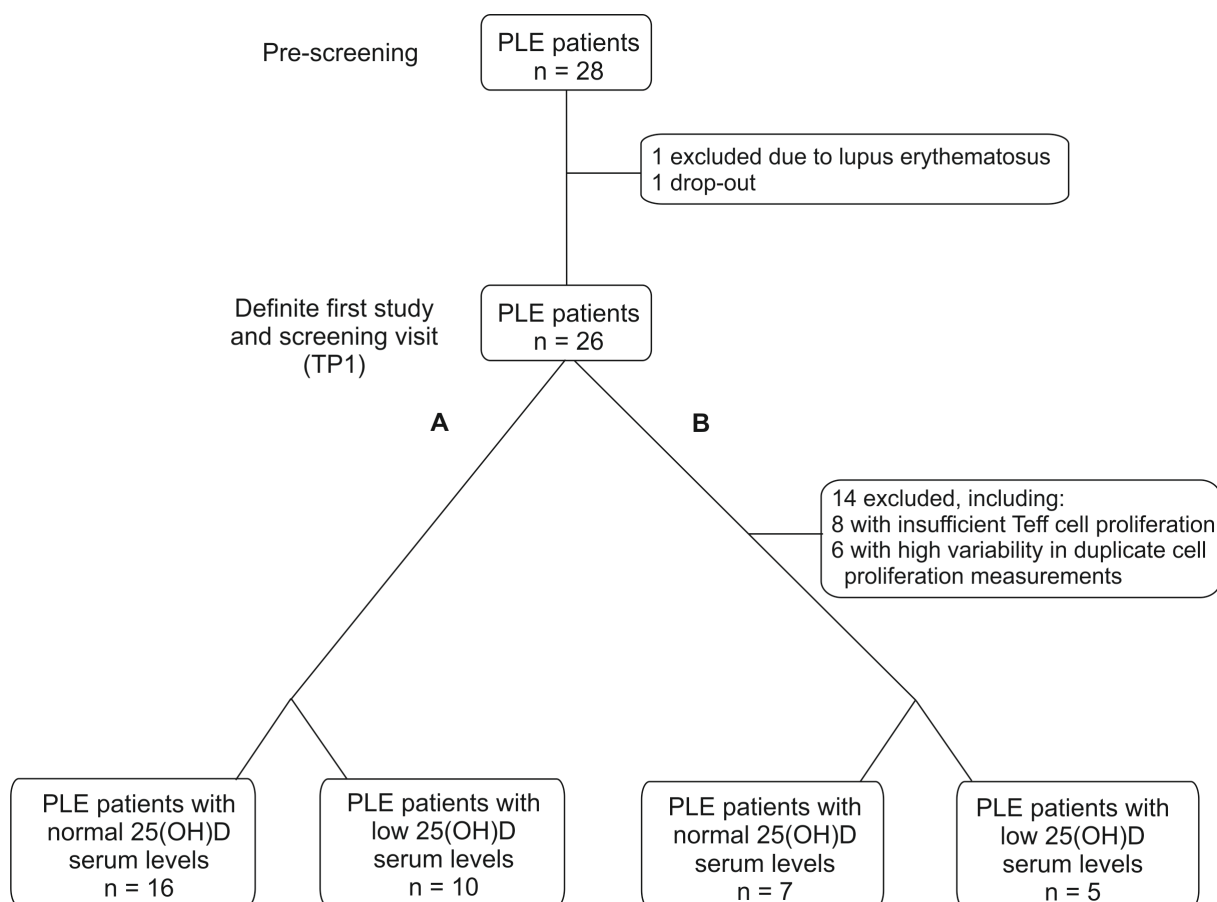

**Supplementary Figure 1.** Flow diagram showing numbers of PLE patients investigated at TP1 by (A) flow cytometry and (B) Treg suppression assays.
