# Supplementary material for: Influence of the season on vitamin D levels and regulatory T cells in patients with polymorphic light eruption
Source: PubMed Central journal article supplement (PMC4841162; doi:10.1039/c5pp00398a), 2016-02-25
Supplement: PP-015-C5PP00398A-s002.pdf [file PP-015-C5PP00398A-s002.pdf]

**Supplementary Table 1. Time table of the original study**

| <b>Study day<br/>(time point)</b> | <b>Actions</b>                                                                                           |
|-----------------------------------|----------------------------------------------------------------------------------------------------------|
| 1 (TP1)                           | Blood sample collection for 25(OH)D<br>determination, 1 <sup>st</sup> MED testing                        |
| 2 - 5                             | 1 <sup>st</sup> Photoprovocation testing                                                                 |
| 8                                 | 1 <sup>st</sup> Photoprovocation reading, 1 <sup>st</sup> administration of<br>vitamin D or placebo      |
| 22 (TP2)                          | Blood sample collection, 2 <sup>nd</sup> administration of<br>vitamin D or placebo                       |
| 36 (TP3)                          | Blood sample collection (TP3), 2 <sup>nd</sup> MED testing,<br>start of 2 <sup>nd</sup> photoprovocation |
| 43                                | 2 <sup>nd</sup> Photoprovocation reading, handing out of<br>questionnaire                                |

**Supplementary Table 2. Characteristics of PLE patients.**

| <b>Characteristics</b>                                                           | <b>Patients with normal 25(OH)D serum levels</b>                               | <b>Patients with low 25(OH)D serum levels</b>                              |
|----------------------------------------------------------------------------------|--------------------------------------------------------------------------------|----------------------------------------------------------------------------|
| <b>Gender</b>                                                                    | f: 12; m: 4                                                                    | f: 8; m: 2                                                                 |
| <b>Age in years (range)</b>                                                      | 45.2 (24-68)                                                                   | 47.2 (25-76)                                                               |
| <b>Skin phototype*, n</b>                                                        | I: 1; II: 8; III: 6; IV: 1                                                     | I: 1; II: 2; III: 7                                                        |
| <b>Mean disease duration in years (range)</b>                                    | 21.2 (1-42)                                                                    | 14.6 (1-29)                                                                |
| <b>Establishment of diagnosis</b>                                                | **PGPH: 16; CE: 7; P: 4; H: 1                                                  | PGPH: 10; CE: 5; P: 3; H: 3                                                |
| <b>Results of photoprovocation (years before study start and at study start)</b> | *** UVA+/UVB+: 1; UVA-/UVB+:1; UVA-/UVB-: 2; nd: 12                            | UVA+/UVB+: 1; UVA-/UVB+: 1; SSR+: 1; nd: 7                                 |
| <b>Pathology of PLE lesions</b>                                                  | **** mp: 2; pap: 6; pv: 7; v: 1                                                | mp: 4; pap: 3; pv: 2; v: 1                                                 |
| <b>Predilection body site</b>                                                    | face: 2; V-neck: 16; arm: 10; forearm: 8; trunk: 10; thigh: 6; leg: 1; foot: 1 | face: 0; V-neck: 9; arm: 4; forearm: 5; trunk: 0; thigh: 2; leg: 0; foot:2 |
| <b>25(OH)D serum levels at TP1 (mean with range)</b>                             | 38.7 (30.4-56.8)                                                               | 24.5 (18.3-28.8)                                                           |

\* According to Fitzpatrick classification; \*\* PGPH = Physician-guided patient history, as described in Patients and Methods; CE = Clinical examination at presentation of the disease; P = Photoprovocation; H = Histology; \*\*\* SSR = solar simulated radiation; +, positive or -, negative for the different wavebands as indicated with laboratory photoprovocation with near-erythemagenic daily exposure over up to 4 days; nd = not done; \*\*\*\* mp = maculopapular; pap = papular; pv = papulovesicular; v = vesicular; abd. = abdomen
